# Supplementary material for: Shift of lung macrophage composition is associated with COVID-19 disease severity and recovery
Source: PubMed Central journal article supplement — bioRxiv. 2022 Jan 12:2022.01.11.475918. Preprint. [Version 1] doi: 10.1101/2022.01.11.475918 (PMC8764718; doi:10.1101/2022.01.11.475918), 2022-01-12
Supplement: media-1.pdf [file media-1.pdf]

# Supplementary Material

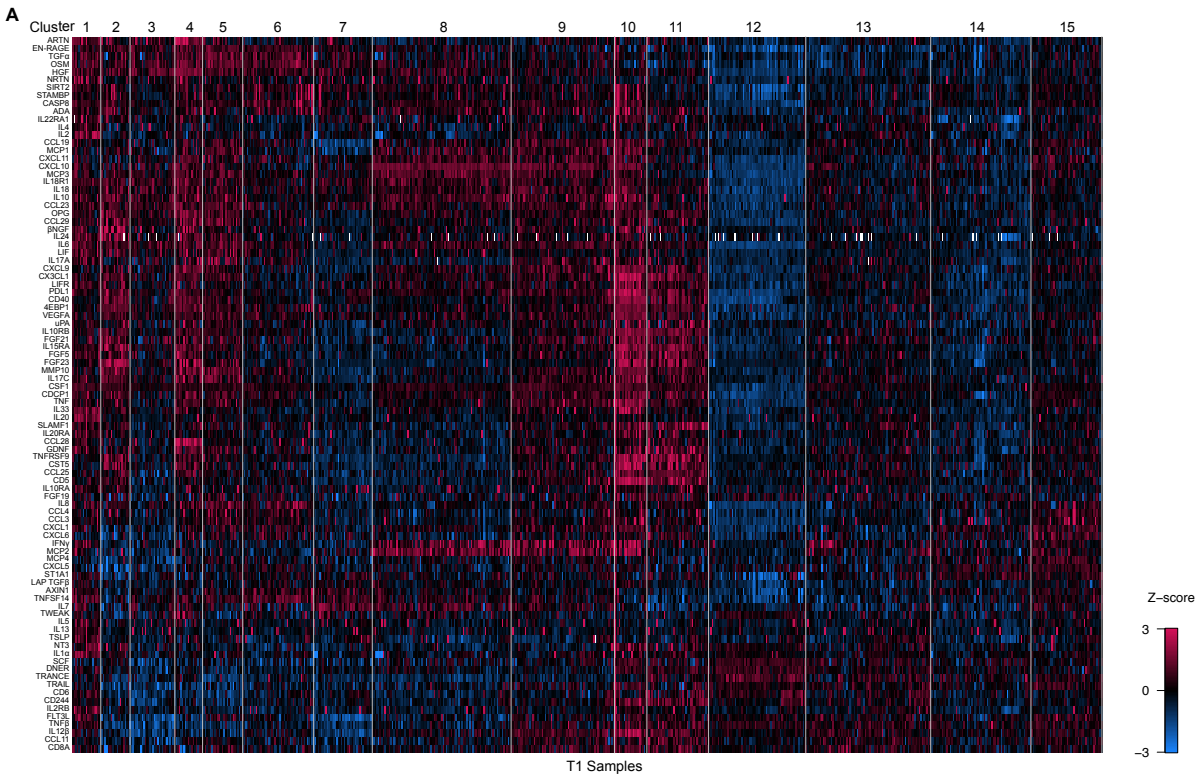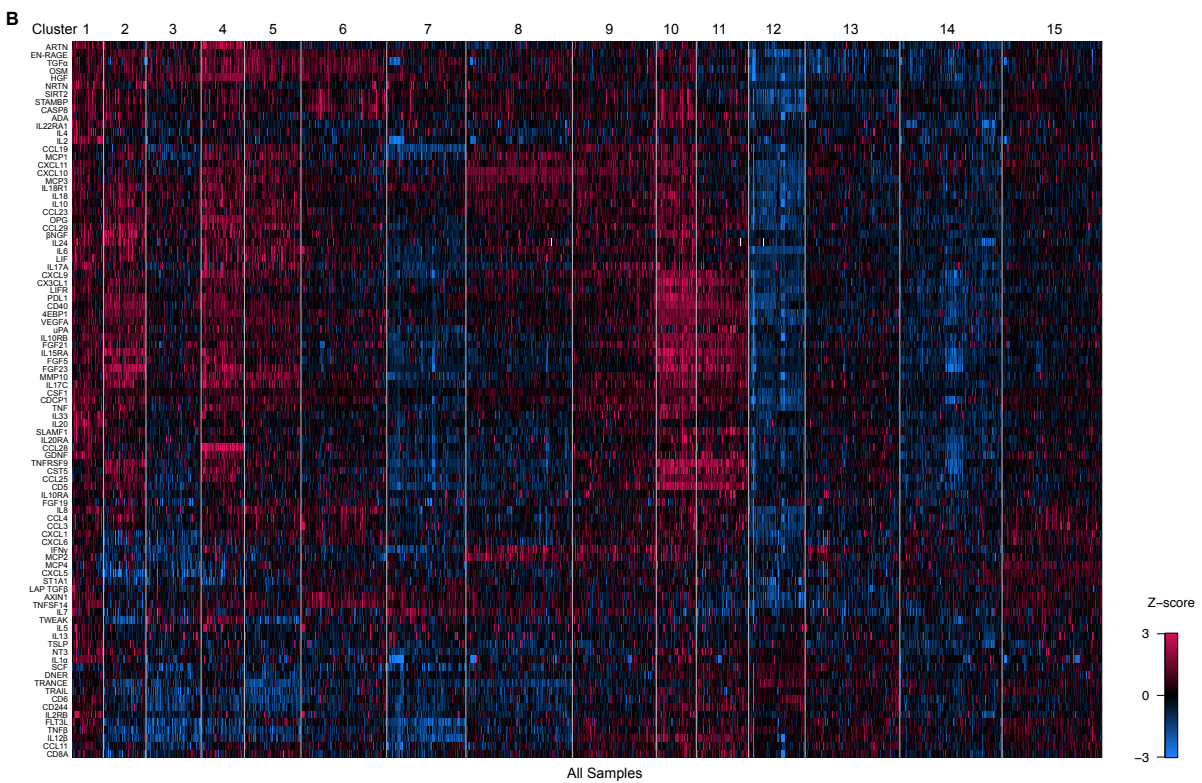

**Supplementary Figure 1. Unsupervised K-means++ clustering of COVID-19 serum proteomics identified 15 distinct immune patterns** **(A)** Heatmap showing cytokine profiles of COVID-19 sera measured with the Olink inflammation panel. Unsupervised K-means++ clustering was performed on normalized values (z-scores) for all serum samples. 15 clusters were identified. Rows denote each protein measured; columns denote proteomic profile of each patient serum sample. **(B)** Heatmap showing cytokine profiles of COVID-19 sera measured with the Olink inflammation panel. Unsupervised K-means++ clustering was performed on normalized values (z-scores) for all T1 serum samples. 15 clusters were identified. Rows denote each protein measured; columns denote proteomic profile of each patient serum sample.

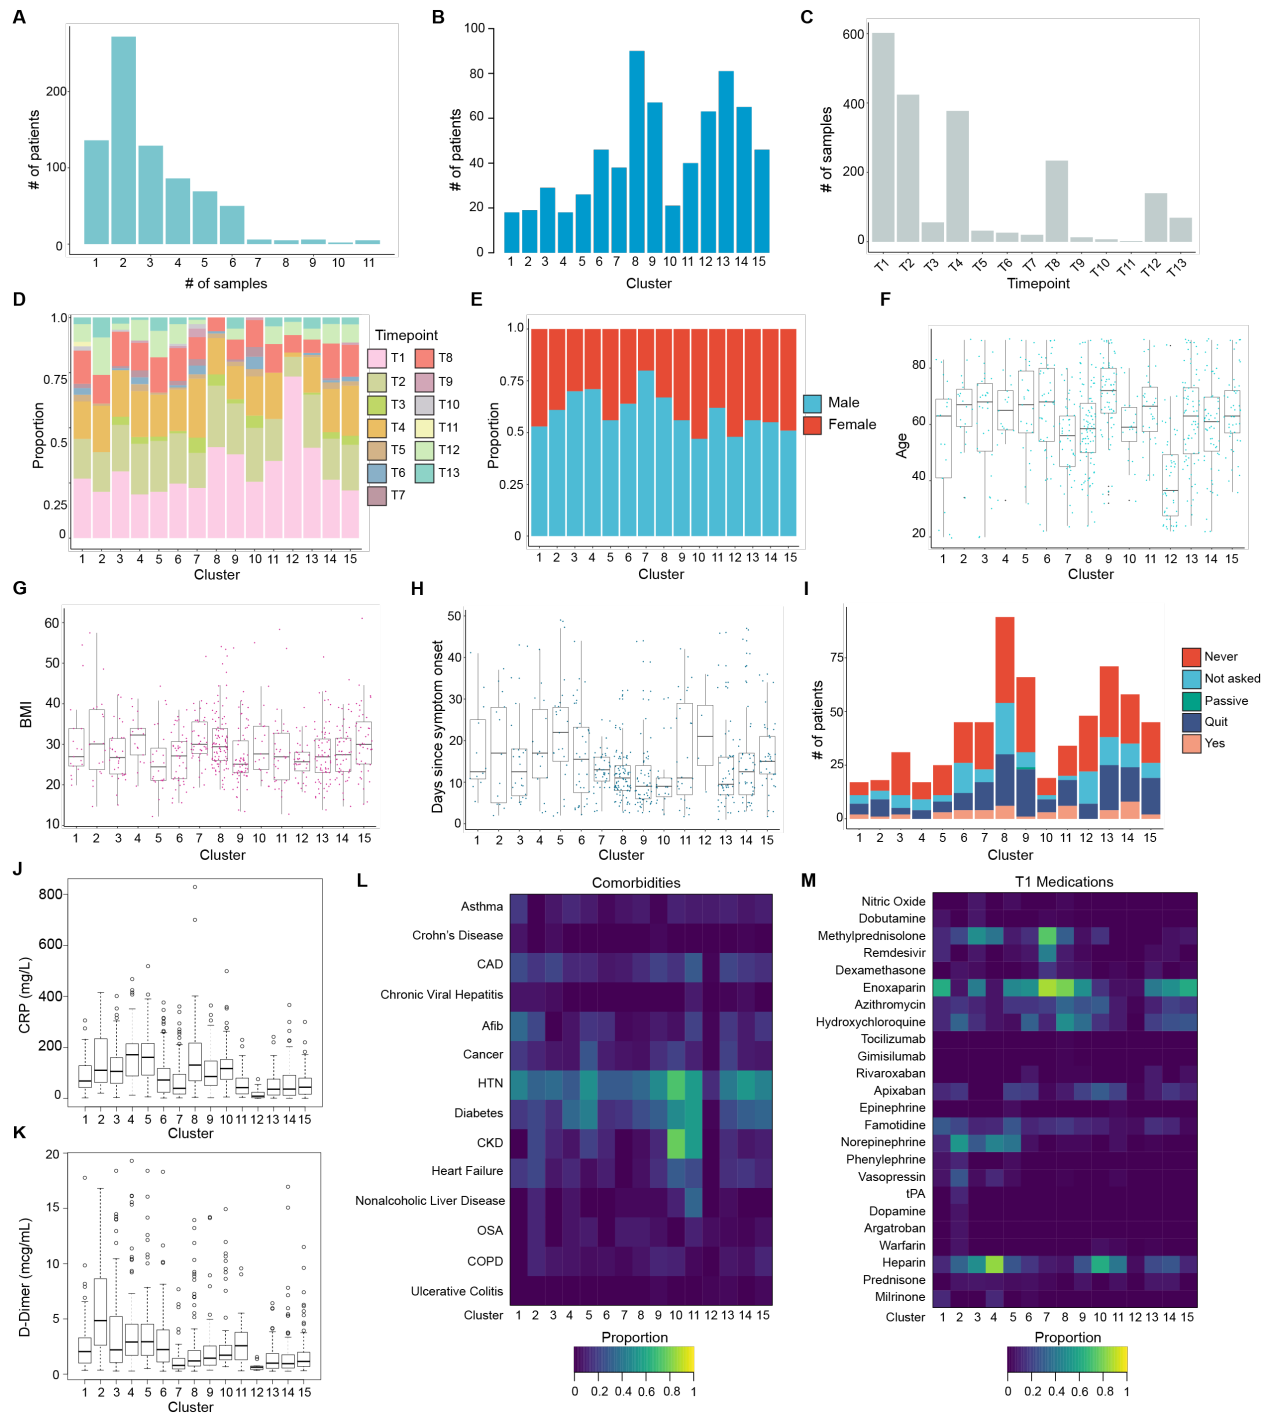

**Supplementary Figure 2. Clinical characteristics of Olink serum clustering analysis. (A)** Histogram showing number of patients by number of samples analyzed. **(B)** Histogram showing number of patients per Olink cluster. **(C)** Histogram showing number of samples acquired for each Timepoint. **(D)** Timepoint distribution per Olink cluster. **(E)** Proportion of sex by Olink cluster. Boxplot showing patients' age **(F)** and BMI **(G)**, and days post symptom onset **(H)** across Olink clusters. Cluster assignment set by first timepoint for each patient. **(I)** Stacked histogram showing smoking status for patients by Olink Cluster. Boxplot showing C-reactive protein **(J)** or D-Dimer levels **(K)** for first available patient samples. Cluster assignment set by first timepoint for each patient. **(L)** Heatmap showing proportion of patients with comorbidities by Olink Cluster. Cluster

assignment set by first timepoint for each patient. **(M)** Heatmap showing proportion of patients receiving medications at time of first sampling.

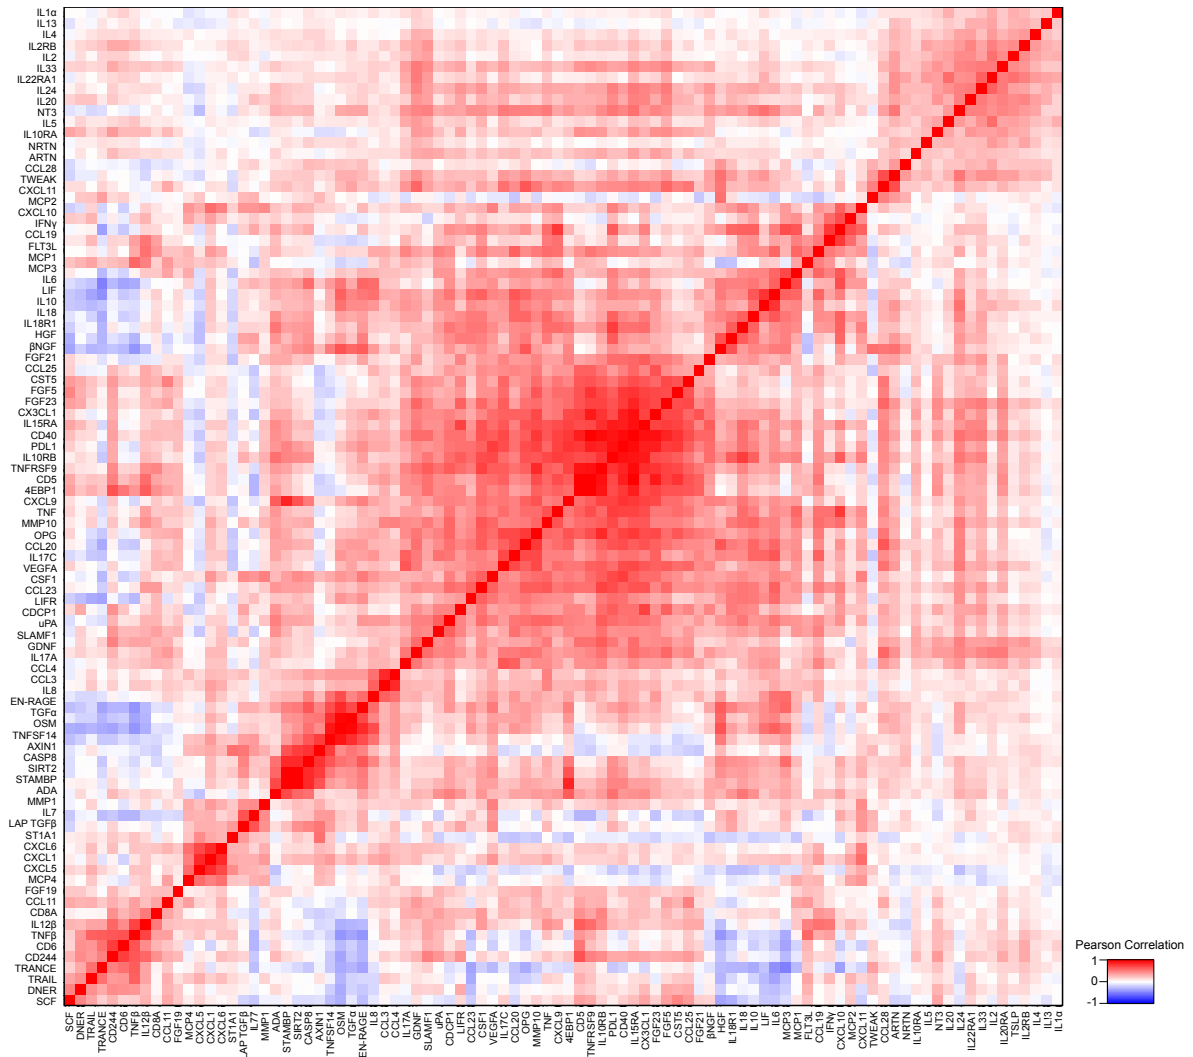

**Supplementary Figure 3. Covariance matrix of Olink analytes in COVID-19 serum.** Heatmap showing Pearson correlations between Olink analytes for all COVID-19 patient serum samples.

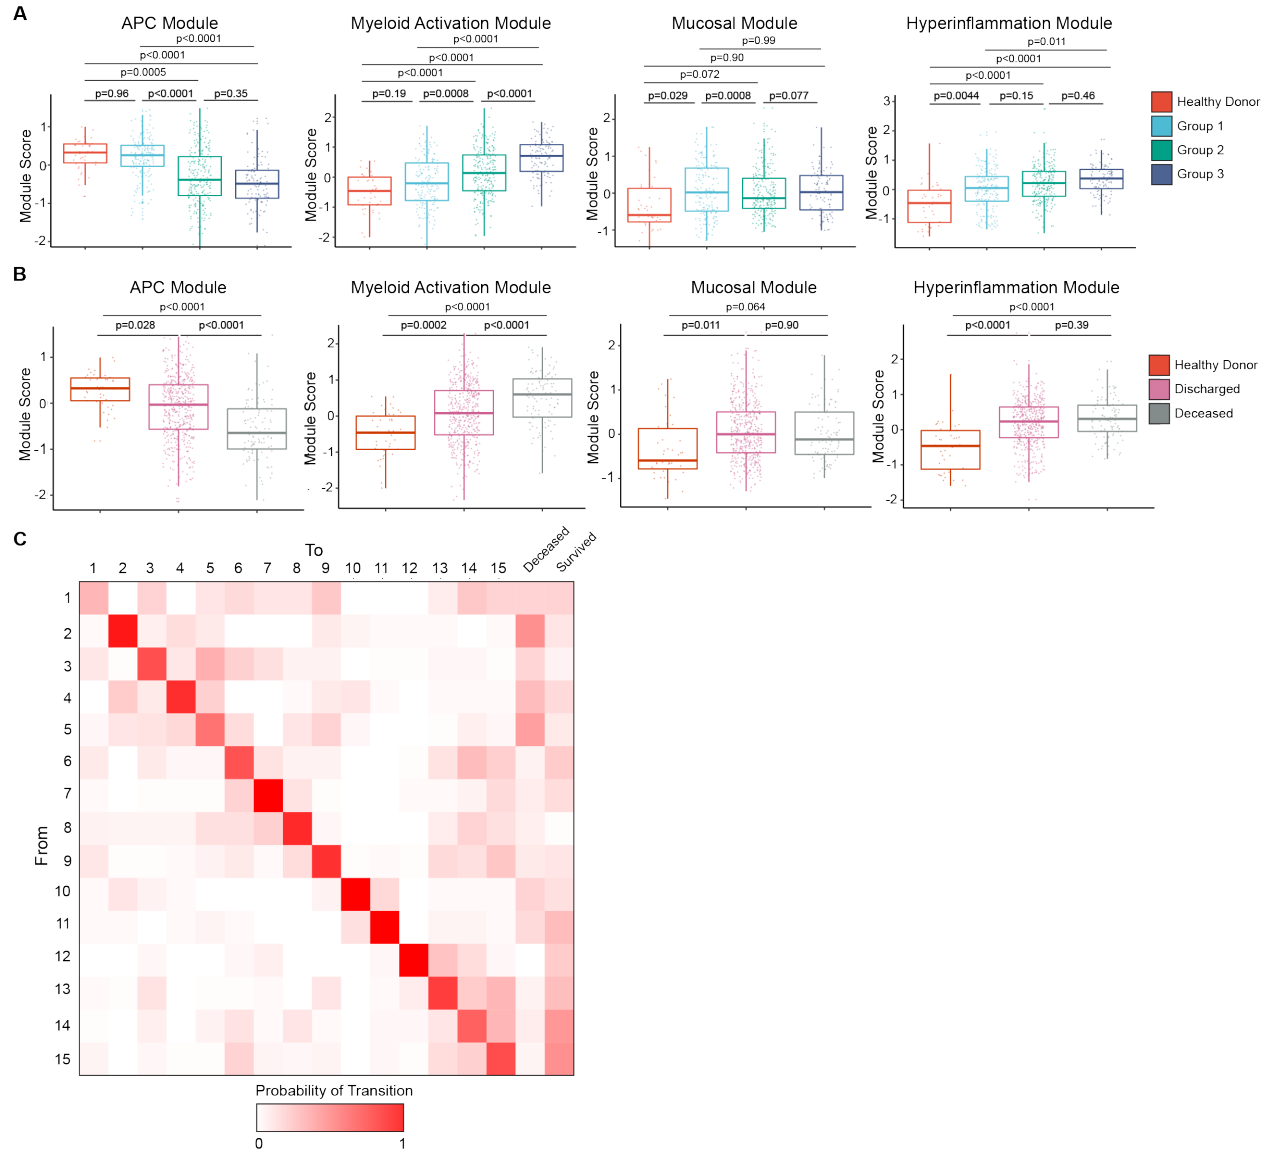

**Supplementary Figure 4. Olink protein module scores are stable and associated with clinical outcome. (A)** Boxplots showing Olink module score comparisons of first available serum samples by Olink group. **(B)** Boxplots showing Olink module score comparisons of first available serum samples by final clinical outcome. **(C)** Heatmap showing discrete time Markov chain analysis probability of transition between Olink clusters and clinical outcome. For box plots, each dot represents a patient sample; center line, median; box limits, 25<sup>th</sup> and 75<sup>th</sup> percentile; whiskers, 1.5x IQR. Statistical significance **(A-B)** determined by 2-way ANOVA with Tukey's Multiple Comparisons correction. Adjusted p-values shown.

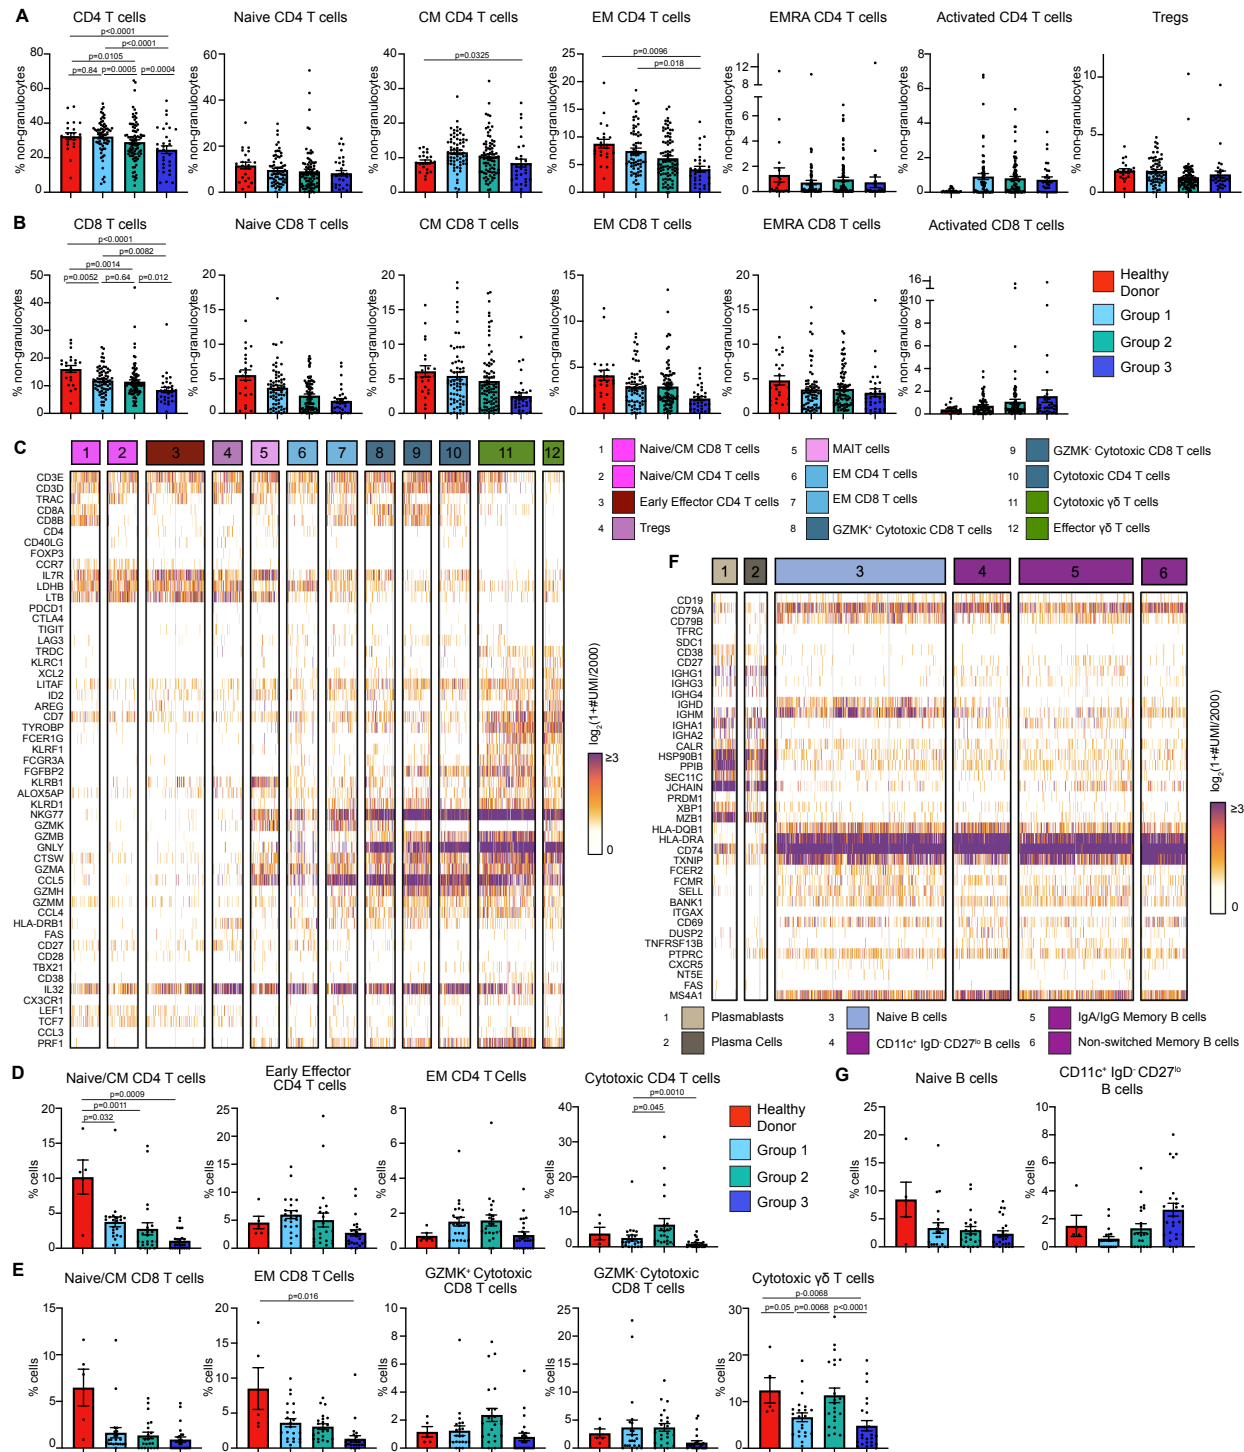

**Supplementary Figure 5. High dimensional characterization of circulating lymphocytes in COVID-19.** CD4 (A) and CD8 (B) T cell population frequencies (% non-granulocytes) in whole blood by Olink group measured by CyTOF. (C) Heatmap showing UMI counts of selected genes from T cell scRNAseq clusters from PBMC. Cell frequencies shown as % cells for select CD4 (D), CD8 and  $\gamma\delta$  T cell (E) scRNAseq clusters. (F) Heatmap showing unique molecular identifier (UMI) counts of selected genes from B cell scRNAseq clusters from PBMC. (G) scRNAseq cell

frequencies shown as % cells for select B cell clusters. For bar graphs, each dot (**A-B, D-E, G**) represents a patient sample. Statistical significance (**A-B, D-E, G**) determined by 2-way ANOVA with Holm-Sidak multiple comparisons correction. Adjusted p-values shown.



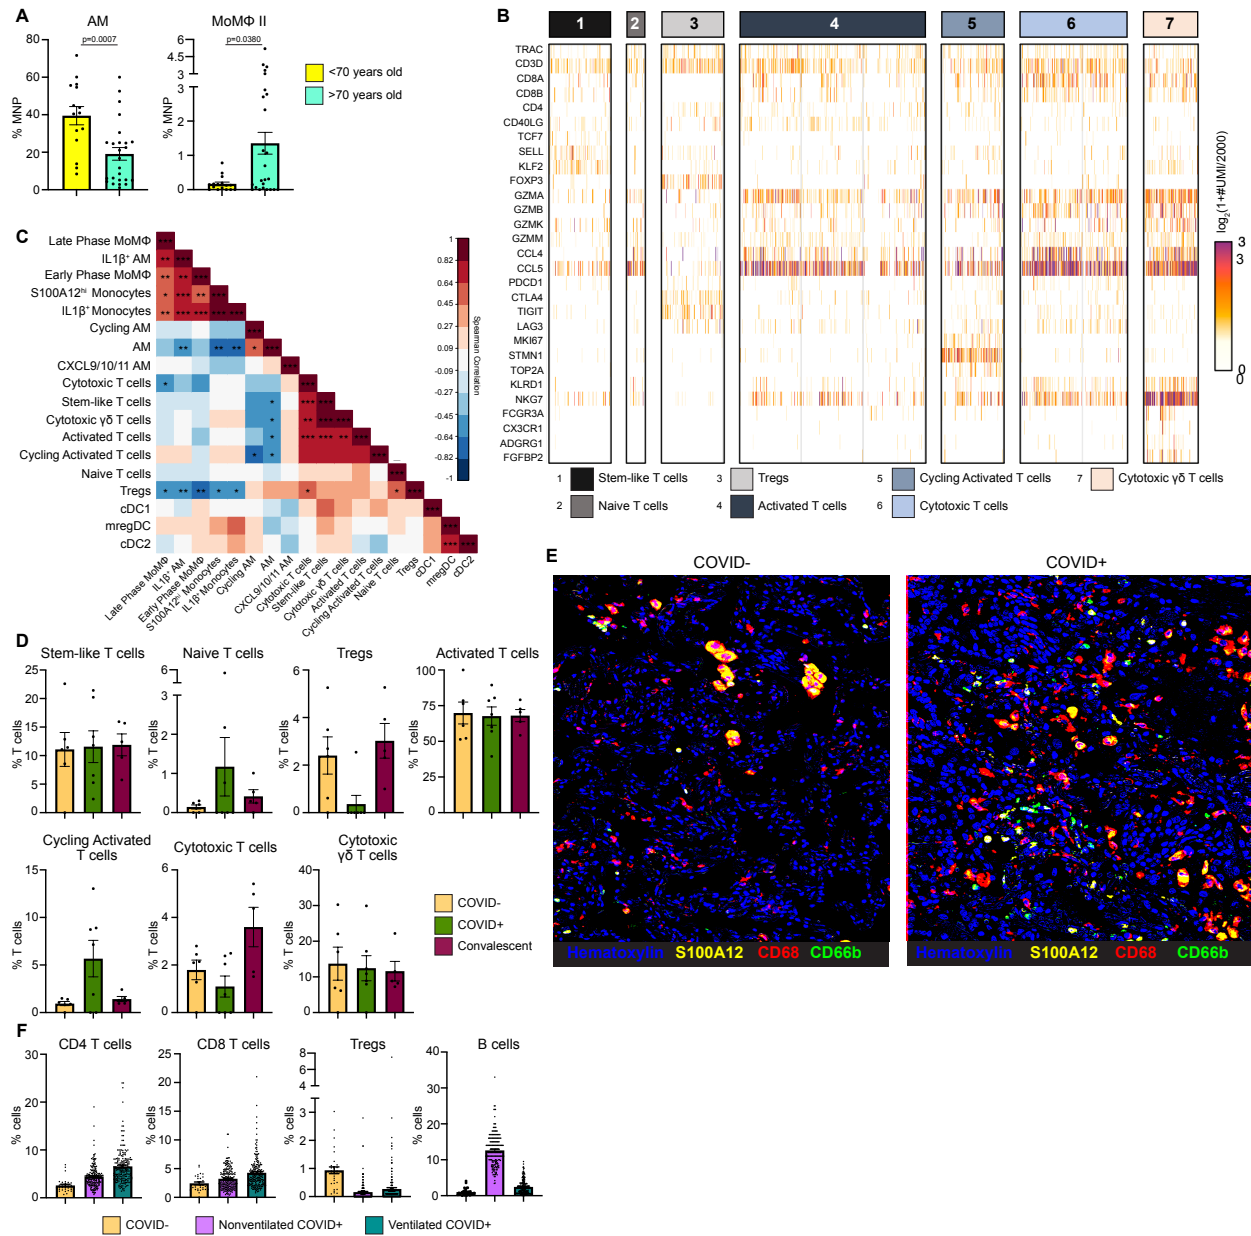

**Supplementary Figure 6. High dimensional characterization of immune cells in BAL (A)** AM and MoMΦ II frequencies as % MNP from scRNAseq analysis of normal lung tissue from untreated early stage non small cell lung cancer patients. Each dot represents single patient sample. Statistical significance determined by Mann-Whitney test. **(B)** Heatmap showing UMI counts of selected genes from T cell scRNAseq clusters from BAL. **(C)** Matrix of Spearman correlation coefficients between identified scRNAseq BAL clusters. \* $p<0.05$ , \*\* $p<0.005$ , \*\*\* $p<0.0005$ . **(D)** scRNAseq T cell cluster frequencies as % T cells from BAL. Each dot represents a patient sample **(E)** Overlaid, pseudocolored MICSSS image of COVID<sup>+</sup> and COVID<sup>-</sup> lungs, staining for S100A12, CD68, CD66b, and Hematoxylin. Granulocyte-like cells defined as CD66b<sup>+</sup> cells. **(F)** Quantification of lymphocytes in MICSSS images, shown as % cells. CD4 T cells defined as CD3<sup>+</sup> CD8<sup>-</sup> cells, CD8 T cells defined as CD3<sup>+</sup> CD8<sup>+</sup> cells, Tregs defined as CD3<sup>+</sup> CD8<sup>-</sup> Foxp3<sup>+</sup> cells, B cells defined as CD20<sup>+</sup> cells.

**Supplementary Table 1. Mount Sinai COVID-19 Biobank Cohort.** IQR, Interquartile Range; EOD, end organ damage; CyTOF, cytometry by time of flight; scRNAseq, single cell RNA sequencing

|                                                           | COVID+     | COVID-     |
|-----------------------------------------------------------|------------|------------|
| Number of Subjects                                        | 583        | 45         |
| Age (Median (IQR))                                        | 63 (53-74) | 36 (26-47) |
| Male Sex (%)                                              | 61.2%      | 46.7%      |
| Deceased                                                  | 17.7%      | 0.0%       |
| <b>COVID-19 clinical severity at time of first sample</b> |            |            |
| Moderate COVID-19                                         | 61.1%      |            |
| Severe COVID-19                                           | 22.8%      |            |
| Severe COVID-19 with EOD                                  | 12.3%      |            |
| N/A                                                       | 3.8%       |            |

**Supplementary Table 2. Mount Sinai Hospital Disease Severity Classification.** SpO<sub>2</sub>, oxygen saturation; CXR, chest X-ray; CrCl, Creatinine Clearance; ALT, Alanine aminotransferase; ULN, upper limit of normal; RRT, renal replacement therapy

| Disease Severity         |                                                                                        |
|--------------------------|----------------------------------------------------------------------------------------|
| Moderate COVID-19        | SpO <sub>2</sub> <94% on RA or pneumonia by CXR, ≤6 L/min O <sub>2</sub> support       |
| Severe COVID-19          | >6L/min O <sub>2</sub> support, (-) pressors, CrCL>30 mL/min, ALT<5x ULN               |
| Severe COVID-19 with EOD | >6 L/min O <sub>2</sub> support, (+) pressors, CrCl<30 mL/min or new RRT or ALT>5x ULN |

**Supplementary Table 3. Clinical information for PBMC scRNAseq samples.** PSO, post symptom onset; HD, healthy donor; EOD, Severe COVID-19 with End Organ Damage; CKD, chronic kidney disease

| Subject ID | Timepoint | Age | Sex | Days PSO | Disease severity | Olink Group | Olink Cluster | Final Clinical Outcome |
|------------|-----------|-----|-----|----------|------------------|-------------|---------------|------------------------|
| PICR8016   | T1        | 28  | M   | n/a      | HD               | n/a         | n/a           | Survived               |
| PICR8017   | T1        | 25  | F   | n/a      | HD               | n/a         | n/a           | Survived               |
| PICR8106   | T1        | 58  | M   | n/a      | HD               | 1           | 12            | Survived               |
| PICR8107   | T1        | 56  | F   | n/a      | HD               | 1           | 12            | Survived               |
| PICR8108   | T1        | 50  | F   | n/a      | HD               | n/a         | n/a           | Survived               |
| PICR8109   | T1        | 51  | M   | n/a      | HD               | n/a         | n/a           | Survived               |
| PICR7250   | T1        | 68  |     | n/a      | n/a              | 1           | 15            | Deceased               |
| PICR7161   | T1        | 65  | M   | 7        | EOD              | 2           | 9             | Survived               |
|            | T12       |     |     | 19       | Moderate         | 1           | 13            |                        |
| PICR7247   | T1        | 65  | F   | 3        | Moderate         | 1           | 13            | Survived               |
|            | T4        |     |     | 8        | Moderate         | 1           | 14            |                        |
| PICR7114   | T1        | 80  | M   | 32       | EOD              | 2           | 6             | Survived               |

|          |     |    |      |     |          |     |     |          |
|----------|-----|----|------|-----|----------|-----|-----|----------|
|          | T4  |    |      | 35  | Moderate | 1   | 13  |          |
|          | T8  |    |      | 39  | Moderate | 1   | 15  |          |
| PICR7393 | T1  | 83 | F    | 16  | Severe   | 1   | 13  | Survived |
|          | T4  |    |      | 19  | Moderate | 2   | 6   |          |
| PICR7061 | T12 | 89 | M    | 19  | Severe   | 1   | 13  | Survived |
| PICR7389 | T1  | 39 | F    | 28  | Moderate | 1   | 14  | Survived |
| PICR7321 | T1  | 59 | M    | 12  | Moderate | 1   | 14  | Survived |
|          | T4  |    |      | 15  | Moderate | 2   | 7   |          |
|          | T8  |    |      | 21  | Moderate | 1   | 14  |          |
| PICR7481 | T13 | 68 | M    | 37  | Moderate | 1   | 14  | Survived |
| PICR7189 | T4  | 39 | M    | 16  | Severe   | 1   | 15  | Survived |
|          | T8  |    |      | 20  | Severe   | 1   | 15  |          |
| PICR7162 | T4  | 47 | F    | 11  | Severe   | 1   | 15  | Survived |
|          | T8  |    |      | 16  | Severe   | 1   | 15  |          |
| PICR7292 | T4  | 53 | M    | 8   | Moderate | 1   | 15  | Survived |
| PICR7059 | T1  | 66 | M    | 5   | Moderate | 2   | 8   | Survived |
|          | T4  |    |      | 8   | Severe   | 2   | 8   |          |
|          | T12 |    |      | 17  | Moderate | 2   | 8   |          |
|          | T13 |    |      | 27  | Moderate | 1   | 15  |          |
| PICR7068 | T4  | 69 | F    | 20  | Moderate | 1   | 15  | Survived |
| PICR7276 | T12 | 71 | M    | 17  | Severe   | 1   | 15  | Survived |
| PICR7066 | T1  | 70 | M    | 11  | Moderate | 2   | 8   | Survived |
|          | T4  |    |      | 17  | n/a      | n/a | n/a |          |
| PICR7420 | T1  | 78 | M    | 29  | Moderate | 2   | 6   | Deceased |
| PICR7146 | T1  | 50 | F    | 17  | Severe   | 2   | 8   | Deceased |
| PICR7218 | T1  | 89 | F    | 18  | Moderate | 3   | 5   | Survived |
|          | T4  |    |      | 21  | Moderate | 2   | 6   |          |
| PICR7403 | T1  | 20 | M    | 5   | EOD      | 3   | 3   | Survived |
|          | T4  |    |      | 9   | Moderate | 2   | 7   |          |
|          | T8  |    |      | 12  | Moderate | 2   | 7   |          |
| PICR7070 | T1  | 70 | M    | n/a | Moderate | 2   | 7   | Survived |
|          | T4  |    |      | n/a | Moderate | 2   | 7   |          |
| PICR7484 | T1  | 66 | M    | 9   | Severe   | 2   | 8   | Survived |
|          | T12 |    |      | 21  | EOD      | 3   | 5   |          |
| PICR7063 | T1  | 69 | M    | 16  | Severe   | 2   | 8   | Survived |
|          | T8  |    |      | 23  | EOD      | 3   | 5   |          |
| PICR7333 | T1  | 32 | M->F | 7   | Severe   | 2   | 9   | Survived |
|          | T4  |    |      | 13  | Severe   | 3   | 1   |          |
| PICR7158 | T1  | 69 | F    | 7   | Moderate | 2   | 9   | Survived |
|          | T4  |    |      | 10  | EOD      | 3   | 4   |          |
|          | T12 |    |      | 20  | EOD      | 3   | 4   |          |
|          | T13 |    |      | 29  | EOD      | 2   | 9   |          |
| PICR7294 | T8  | 80 | M    | 21  | Moderate | 2   | 9   | Survived |
| PICR7073 | T1  | 47 | M    | 23  | EOD      | CKD | 10  | Deceased |
|          | T4  |    |      | 26  | EOD      | CKD | 11  |          |
|          | T8  |    |      | 30  | EOD      | 3   | 2   |          |
|          | T12 |    |      | 37  | EOD      | 3   | 2   |          |
| PICR7363 | T8  | 74 | F    | n/a | EOD      | 3   | 5   | Deceased |
| PICR7125 | T1  | 94 | F    | 10  | EOD      | 3   | 2   | Deceased |

|          |     |    |   |     |          |     |    |          |
|----------|-----|----|---|-----|----------|-----|----|----------|
| PICR7239 | T1  | 68 | F | 14  | Severe   | 3   | 3  | Deceased |
| PICR7405 | T4  | 84 | F | n/a | EOD      | 3   | 5  | Deceased |
| PICR7292 | T1  | 53 | M | 5   | Moderate | 3   | 1  | Survived |
| PICR7091 | T4  | 66 | F | 9   | EOD      | 3   | 2  | Survived |
|          | T8  |    |   | 12  | Moderate | 3   | 2  |          |
|          | T12 |    |   | 16  | Moderate | 3   | 4  |          |
| PICR7476 | T1  | 70 | F | 3   | EOD      | 3   | 4  | Survived |
|          | T4  |    |   | 6   | Moderate | 3   | 2  |          |
| PICR7173 | T1  | 65 | M | 24  | EOD      | 3   | 3  | Survived |
|          | T4  |    |   | 27  | EOD      | 3   | 3  |          |
| PICR7175 | T4  | 69 | F | 6   | EOD      | 3   | 4  | Survived |
|          | T8  |    |   | 11  | EOD      | 3   | 4  |          |
|          | T12 |    |   | 21  | Severe   | 3   | 3  |          |
|          | T13 |    |   | 25  | Severe   | CKD | 11 |          |
| PICR7224 | T4  | 59 | F | 16  | Moderate | CKD | 10 | Deceased |
|          | T8  |    |   | 20  | Moderate | CKD | 10 |          |
|          | T12 |    |   | 23  | Moderate | CKD | 10 |          |
| PICR7178 | T1  | 33 | F | 9   | Moderate | CKD | 10 | Survived |
| PICR7266 | T4  | 57 | F | 36  | Moderate | CKD | 11 | Survived |
|          | T8  |    |   | 40  | Moderate | CKD | 11 |          |

**Supplementary Table 4. Clinical information for BAL samples.** PSO, post symptom onset; PI, post intubation

| Subject ID | COVID Status | Outcome  | Days PSO | Days PI | Age | Sex |
|------------|--------------|----------|----------|---------|-----|-----|
| PICR7406   | +            | Deceased | 10       | 2       | 77  | F   |
| PICR7386   | +            | Survived | 17       | 2       | 56  | M   |
| PICR7295   | +            | Deceased | 46       | 15      | 51  | M   |
| PICR7022   | +            | Survived | 41       | 2       | 51  | M   |
| BAL8010    | +            | Deceased | 22       | 1       | 72  | M   |
| BAL8014    | +            | Deceased | 18       | 0       | 94  | F   |
| BAL8020    | +            | Survived | 21       | 3       | 51  | F   |
| BAL8007    | -            | Survived |          |         | 61  | F   |
| BAL8008    | Convalescent | Survived |          |         | 44  | M   |
| BAL8009    | Convalescent | Survived |          |         | 51  | M   |
| BAL8011    | -            | Survived |          |         | 70  | F   |
| BAL8012    | -            | Survived |          |         | 65  | M   |
| BAL8016    | -            | Survived |          |         | 61  | M   |
| BAL8017    | -            | Survived |          |         | 53  | M   |
| BAL8021    | Convalescent | Survived |          |         | 72  | M   |
| BAL8022    | -            | Survived |          |         | 59  | M   |
| BAL8024    | Convalescent | Survived |          |         | 61  | M   |
| BAL8027    | Convalescent | Survived |          |         | 62  | F   |

**Supplementary Table 5. Clinical Information for lung autopsy samples.** PMI, post mortem interval; PSO, post symptom onset; AHRF, acute hypoxic respiratory failure; 2/2, secondary to

| <b>Subject ID</b> | <b>Age</b> | <b>Sex</b> | <b>PMI (hours)</b> | <b>Days PSO</b> | <b>Days hospitalized</b> | <b>Intubated</b> | <b>Cause of Death</b> |
|-------------------|------------|------------|--------------------|-----------------|--------------------------|------------------|-----------------------|
| MA-20-120         | 59         | F          | 5.5                | 13              | 8                        | No               | AHRF 2/2<br>COVID-19  |
| MA-20-149         | 77         | F          | 7.5                | 25              | 22                       | Yes              | AHRF 2/2<br>COVID-19  |
| MA-20-123         | 61         | M          | 3                  | 29              | 48                       | Yes              | AHRF 2/2<br>COVID-19  |
| MA-20-81          | 57         | F          | N/A                | 4               | 4                        | No               | AHRF 2/2<br>COVID-19  |
